# Supplementary material
Source: PubMed Central journal article supplement (PMC5774986)
Supplement: NIHMS882836-supplement-1.pdf [file NIHMS882836-supplement-1.pdf]

## **Supplementary Information: Large-scale physical activity data reveal worldwide activity inequality**

Tim Althoff,<sup>1</sup> Rok Sosič,<sup>1</sup> Jennifer L. Hicks,<sup>2</sup> Abby C. King,<sup>3,4</sup> Scott L. Delp,<sup>2,5</sup> Jure Leskovec<sup>1,6\*</sup>

<sup>1</sup>Computer Science Department, Stanford University

<sup>2</sup>Department of Bioengineering, Stanford University

<sup>3</sup>Department of Health Research & Policy, Stanford University School of Medicine

<sup>4</sup>Stanford Prevention Research Center, Department of Medicine, Stanford University School of Medicine

<sup>5</sup>Department of Mechanical Engineering, Stanford University

<sup>6</sup>Chan Zuckerberg Biohub, San Francisco, CA

\*To whom correspondence should be addressed;

E-mail: [jure@cs.stanford.edu](mailto:jure@cs.stanford.edu)

Supplementary Table 1: Summary of dataset statistics for the 46 countries with more than 1000 subjects (693,806 subjects in total; Methods). Countries are ordered by number of subjects in sample. Country-level analyses are restricted to these 46 countries. Percentages are in parentheses. NA refers to missingness in data. Table continued on next page with additional columns.

| Country Name         | #subjects | Mean Steps | Activity Inequality | #male        | #female      | #genderNA     | Median Age | #AgeNA        |
|----------------------|-----------|------------|---------------------|--------------|--------------|---------------|------------|---------------|
| United States        | 388124    | 4774       | 0.303               | 94707 (48.9) | 98971 (51.1) | 194446 (50.1) | 34         | 168610 (43.4) |
| United Kingdom       | 55110     | 5444       | 0.288               | 15144 (54.8) | 12508 (45.2) | 27458 (49.8)  | 33         | 23557 (42.7)  |
| Canada               | 26895     | 4819       | 0.303               | 7022 (49.2)  | 7250 (50.8)  | 12623 (46.9)  | 34         | 10962 (40.8)  |
| Australia            | 26644     | 4941       | 0.304               | 6858 (51.4)  | 6479 (48.6)  | 13307 (49.9)  | 34         | 11075 (41.6)  |
| Japan                | 20386     | 6010       | 0.248               | 6696 (76.2)  | 2090 (23.8)  | 11600 (56.9)  | 38         | 9016 (44.2)   |
| China                | 17427     | 6189       | 0.245               | 7553 (61.3)  | 4769 (38.7)  | 5105 (29.3)   | 28         | 5097 (29.2)   |
| Germany              | 12234     | 5205       | 0.266               | 4740 (72.8)  | 1775 (27.2)  | 5719 (46.7)   | 34         | 4666 (38.1)   |
| India                | 11148     | 4297       | 0.293               | 4092 (79.0)  | 1086 (21.0)  | 5970 (53.6)   | 33         | 4818 (43.2)   |
| France               | 8185      | 5141       | 0.268               | 2833 (67.2)  | 1384 (32.8)  | 3968 (48.5)   | 33         | 3435 (42.0)   |
| Russia               | 7911      | 5969       | 0.262               | 2071 (59.9)  | 1385 (40.1)  | 4455 (56.3)   | 28         | 3104 (39.2)   |
| Spain                | 6723      | 5936       | 0.261               | 2496 (70.8)  | 1027 (29.2)  | 3200 (47.6)   | 36         | 2538 (37.8)   |
| Netherlands          | 6239      | 5110       | 0.261               | 2092 (64.1)  | 1171 (35.9)  | 2976 (47.7)   | 35         | 2311 (37.0)   |
| Mexico               | 5695      | 4692       | 0.279               | 1497 (65.0)  | 806 (35.0)   | 3392 (59.6)   | 32         | 2831 (49.7)   |
| Italy                | 5567      | 5296       | 0.275               | 1724 (68.3)  | 801 (31.7)   | 3042 (54.6)   | 36         | 2528 (45.4)   |
| Singapore            | 5411      | 5674       | 0.249               | 1567 (62.3)  | 947 (37.7)   | 2897 (53.5)   | 35         | 2273 (42.0)   |
| Sweden               | 5177      | 5863       | 0.246               | 1309 (52.1)  | 1202 (47.9)  | 2666 (51.5)   | 34         | 2277 (44.0)   |
| South Korea          | 5022      | 5755       | 0.247               | 1235 (66.5)  | 621 (33.5)   | 3166 (63.0)   | 33         | 2270 (45.2)   |
| Taiwan               | 4821      | 5000       | 0.262               | 987 (64.6)   | 540 (35.4)   | 3294 (68.3)   | 34         | 2404 (49.9)   |
| Hong Kong SAR China  | 4754      | 6880       | 0.222               | 1288 (62.0)  | 789 (38.0)   | 2677 (56.3)   | 33         | 2015 (42.4)   |
| Turkey               | 4711      | 5057       | 0.264               | 1197 (54.5)  | 1000 (45.5)  | 2514 (53.4)   | 31         | 2106 (44.7)   |
| Thailand             | 4615      | 4764       | 0.272               | 1026 (62.9)  | 604 (37.1)   | 2985 (64.7)   | 32         | 2438 (52.8)   |
| Norway               | 4256      | 5246       | 0.252               | 1061 (52.3)  | 967 (47.7)   | 2228 (52.3)   | 30         | 1803 (42.4)   |
| United Arab Emirates | 4138      | 4516       | 0.281               | 1315 (66.1)  | 673 (33.9)   | 2150 (52.0)   | 33         | 1723 (41.6)   |
| Brazil               | 3999      | 4289       | 0.272               | 1127 (71.3)  | 453 (28.7)   | 2419 (60.5)   | 33         | 1946 (48.7)   |
| Denmark              | 3924      | 5263       | 0.262               | 1000 (57.1)  | 750 (42.9)   | 2174 (55.4)   | 33         | 1804 (46.0)   |
| Saudi Arabia         | 3837      | 3807       | 0.325               | 1153 (64.8)  | 626 (35.2)   | 2058 (53.6)   | 29         | 1650 (43.0)   |
| Malaysia             | 3787      | 3963       | 0.288               | 937 (53.5)   | 814 (46.5)   | 2036 (53.8)   | 30         | 1589 (42.0)   |
| Belgium              | 3051      | 4978       | 0.276               | 881 (61.9)   | 542 (38.1)   | 1628 (53.4)   | 33         | 1299 (42.6)   |
| New Zealand          | 2941      | 4582       | 0.301               | 706 (49.3)   | 727 (50.7)   | 1508 (51.3)   | 33         | 1235 (42.0)   |
| Philippines          | 2892      | 4008       | 0.298               | 550 (51.7)   | 513 (48.3)   | 1829 (63.2)   | 31         | 1476 (51.0)   |
| Ireland              | 2758      | 5293       | 0.285               | 718 (50.3)   | 709 (49.7)   | 1331 (48.3)   | 33         | 1159 (42.0)   |
| South Africa         | 2718      | 4105       | 0.284               | 900 (65.3)   | 479 (34.7)   | 1339 (49.3)   | 35         | 1124 (41.4)   |
| Ukraine              | 2420      | 6107       | 0.252               | 507 (56.6)   | 388 (43.4)   | 1525 (63.0)   | 27         | 1015 (41.9)   |
| Indonesia            | 2326      | 3513       | 0.283               | 760 (67.4)   | 368 (32.6)   | 1198 (51.5)   | 31         | 925 (39.8)    |
| Switzerland          | 2251      | 5512       | 0.263               | 820 (64.9)   | 444 (35.1)   | 987 (43.8)    | 37         | 774 (34.4)    |
| Czech Republic       | 2132      | 5508       | 0.248               | 708 (71.2)   | 286 (28.8)   | 1138 (53.4)   | 32         | 929 (43.6)    |
| Poland               | 2128      | 5249       | 0.269               | 643 (63.5)   | 370 (36.5)   | 1115 (52.4)   | 31         | 901 (42.3)    |
| Israel               | 1489      | 5033       | 0.272               | 458 (65.0)   | 247 (35.0)   | 784 (52.7)    | 34         | 650 (43.7)    |
| Finland              | 1488      | 5204       | 0.266               | 388 (50.5)   | 381 (49.5)   | 719 (48.3)    | 31         | 612 (41.1)    |
| Romania              | 1422      | 4759       | 0.283               | 380 (64.0)   | 214 (36.0)   | 828 (58.2)    | 31         | 653 (45.9)    |
| Portugal             | 1418      | 4744       | 0.276               | 431 (64.8)   | 234 (35.2)   | 753 (53.1)    | 34         | 614 (43.3)    |
| Egypt                | 1213      | 4315       | 0.303               | 290 (72.0)   | 113 (28.0)   | 810 (66.8)    | 26         | 647 (53.3)    |
| Greece               | 1159      | 4350       | 0.295               | 455 (74.2)   | 158 (25.8)   | 546 (47.1)    | 36         | 452 (39.0)    |
| Hungary              | 1151      | 5258       | 0.273               | 357 (67.1)   | 175 (32.9)   | 619 (53.8)    | 30         | 519 (45.1)    |
| Chile                | 1060      | 5204       | 0.263               | 270 (64.0)   | 152 (36.0)   | 638 (60.2)    | 31         | 525 (49.5)    |
| Qatar                | 1049      | 4158       | 0.291               | 370 (71.4)   | 148 (28.6)   | 531 (50.6)    | 33         | 413 (39.4)    |

Supplementary Table 1: Summary of dataset statistics for the 46 countries with more than 1000 subjects (693,806 subjects in total; Methods). Countries are ordered by number of subjects in sample. Country-level analyses are restricted to these 46 countries. Percentages are in parentheses. NA refers to missingness in data. (Continued from page 2.)

| Country Name         | #BMI [15, 18.5) | #BMI [18.5, 25) | #BMI [25, 30) | #BMI [30, 35) | #BMI [35, 40) | #BMI [40, inf) | #BMI NA       | #obese       |
|----------------------|-----------------|-----------------|---------------|---------------|---------------|----------------|---------------|--------------|
| United States        | 5940 (2.3)      | 95959 (37.3)    | 83818 (32.5)  | 41669 (16.2)  | 17410 (6.8)   | 12129 (4.7)    | 130604 (33.7) | 71208 (27.7) |
| United Kingdom       | 1133 (3.1)      | 16093 (44.4)    | 11696 (32.3)  | 4643 (12.8)   | 1514 (4.2)    | 920 (2.5)      | 18857 (34.2)  | 7077 (19.5)  |
| Canada               | 533 (3.0)       | 7599 (42.1)     | 5808 (32.2)   | 2486 (13.8)   | 926 (5.1)     | 618 (3.4)      | 8847 (32.9)   | 4030 (22.3)  |
| Australia            | 588 (3.2)       | 7756 (42.0)     | 6091 (33.0)   | 2487 (13.5)   | 912 (4.9)     | 563 (3.0)      | 8172 (30.7)   | 3962 (21.4)  |
| Japan                | 795 (5.5)       | 9739 (67.2)     | 3151 (21.7)   | 632 (4.4)     | 118 (0.8)     | 42 (0.3)       | 5889 (28.9)   | 792 (5.5)    |
| China                | 1040 (8.4)      | 8377 (67.8)     | 2439 (19.8)   | 375 (3.0)     | 64 (0.5)      | 20 (0.2)       | 5080 (29.2)   | 459 (3.7)    |
| Germany              | 243 (2.7)       | 4399 (49.0)     | 3043 (33.9)   | 971 (10.8)    | 200 (2.2)     | 112 (1.2)      | 3253 (26.6)   | 1283 (14.3)  |
| India                | 188 (2.5)       | 3017 (39.6)     | 3131 (41.1)   | 968 (12.7)    | 196 (2.6)     | 78 (1.0)       | 3528 (31.6)   | 1242 (16.3)  |
| France               | 302 (5.2)       | 3384 (58.2)     | 1596 (27.5)   | 370 (6.4)     | 111 (1.9)     | 36 (0.6)       | 2375 (29.0)   | 517 (8.9)    |
| Russia               | 386 (6.8)       | 3152 (55.2)     | 1545 (27.1)   | 480 (8.4)     | 100 (1.8)     | 33 (0.6)       | 2204 (27.9)   | 613 (10.7)   |
| Spain                | 131 (2.6)       | 2611 (51.0)     | 1743 (34.0)   | 473 (9.2)     | 124 (2.4)     | 31 (0.6)       | 1600 (23.8)   | 628 (12.3)   |
| Netherlands          | 125 (2.6)       | 2552 (53.6)     | 1572 (33.0)   | 363 (7.6)     | 94 (2.0)      | 37 (0.8)       | 1481 (23.7)   | 494 (10.4)   |
| Mexico               | 85 (2.3)        | 1605 (42.8)     | 1363 (36.4)   | 501 (13.4)    | 132 (3.5)     | 46 (1.2)       | 1949 (34.2)   | 679 (18.1)   |
| Italy                | 157 (3.8)       | 2366 (57.3)     | 1224 (29.6)   | 281 (6.8)     | 63 (1.5)      | 26 (0.6)       | 1437 (25.8)   | 370 (9.0)    |
| Singapore            | 217 (5.8)       | 2099 (56.0)     | 1071 (28.6)   | 271 (7.2)     | 50 (1.3)      | 26 (0.7)       | 1666 (30.8)   | 347 (9.3)    |
| Sweden               | 103 (3.0)       | 1842 (53.1)     | 1080 (31.1)   | 317 (9.1)     | 88 (2.5)      | 31 (0.9)       | 1705 (32.9)   | 436 (12.6)   |
| South Korea          | 177 (4.8)       | 2272 (61.4)     | 1032 (27.9)   | 184 (5.0)     | 26 (0.7)      | 7 (0.2)        | 1320 (26.3)   | 217 (5.9)    |
| Taiwan               | 196 (5.3)       | 2289 (61.7)     | 973 (26.2)    | 208 (5.6)     | 31 (0.8)      | 6 (0.2)        | 1114 (23.1)   | 245 (6.6)    |
| Hong Kong SAR China  | 268 (7.7)       | 2235 (64.6)     | 744 (21.5)    | 148 (4.3)     | 25 (0.7)      | 21 (0.6)       | 1292 (27.2)   | 194 (5.6)    |
| Turkey               | 130 (4.1)       | 1556 (48.6)     | 1071 (33.5)   | 333 (10.4)    | 78 (2.4)      | 22 (0.7)       | 1511 (32.1)   | 433 (13.5)   |
| Thailand             | 243 (7.2)       | 2014 (59.5)     | 809 (23.9)    | 236 (7.0)     | 49 (1.4)      | 24 (0.7)       | 1228 (26.6)   | 309 (9.1)    |
| Norway               | 113 (3.7)       | 1562 (51.3)     | 961 (31.6)    | 303 (10.0)    | 75 (2.5)      | 23 (0.8)       | 1211 (28.5)   | 401 (13.2)   |
| United Arab Emirates | 66 (2.3)        | 1043 (37.0)     | 1100 (39.0)   | 435 (15.4)    | 109 (3.9)     | 52 (1.8)       | 1319 (31.9)   | 596 (21.1)   |
| Brazil               | 52 (1.9)        | 1175 (41.8)     | 1061 (37.8)   | 383 (13.6)    | 98 (3.5)      | 33 (1.2)       | 1189 (29.7)   | 514 (18.3)   |
| Denmark              | 102 (3.7)       | 1459 (53.3)     | 813 (29.7)    | 246 (9.0)     | 78 (2.8)      | 26 (0.9)       | 1186 (30.2)   | 350 (12.8)   |
| Saudi Arabia         | 91 (3.8)        | 819 (33.8)      | 861 (35.5)    | 400 (16.5)    | 133 (5.5)     | 100 (4.1)      | 1414 (36.9)   | 633 (26.1)   |
| Malaysia             | 152 (5.6)       | 1315 (48.1)     | 843 (30.8)    | 287 (10.5)    | 94 (3.4)      | 36 (1.3)       | 1051 (27.8)   | 417 (15.2)   |
| Belgium              | 93 (4.1)        | 1287 (57.2)     | 656 (29.1)    | 163 (7.2)     | 39 (1.7)      | 9 (0.4)        | 800 (26.2)    | 211 (9.4)    |
| New Zealand          | 67 (3.3)        | 861 (42.9)      | 668 (33.3)    | 281 (14.0)    | 82 (4.1)      | 43 (2.1)       | 932 (31.7)    | 406 (20.2)   |
| Philippines          | 77 (4.0)        | 980 (50.9)      | 590 (30.6)    | 191 (9.9)     | 44 (2.3)      | 28 (1.5)       | 967 (33.4)    | 263 (13.7)   |
| Ireland              | 40 (2.2)        | 851 (47.5)      | 584 (32.6)    | 203 (11.3)    | 65 (3.6)      | 32 (1.8)       | 966 (35.0)    | 300 (16.7)   |
| South Africa         | 42 (2.3)        | 653 (36.5)      | 632 (35.3)    | 325 (18.1)    | 88 (4.9)      | 46 (2.6)       | 927 (34.1)    | 459 (25.6)   |
| Ukraine              | 150 (8.6)       | 999 (57.1)      | 444 (25.4)    | 122 (7.0)     | 21 (1.2)      | 8 (0.5)        | 671 (27.7)    | 151 (8.6)    |
| Indonesia            | 107 (6.5)       | 815 (49.4)      | 532 (32.2)    | 147 (8.9)     | 28 (1.7)      | 10 (0.6)       | 675 (29.0)    | 185 (11.2)   |
| Switzerland          | 58 (3.4)        | 964 (57.0)      | 513 (30.3)    | 122 (7.2)     | 25 (1.5)      | 7 (0.4)        | 559 (24.8)    | 154 (9.1)    |
| Czech Republic       | 71 (4.3)        | 823 (50.0)      | 534 (32.4)    | 156 (9.5)     | 51 (3.1)      | 9 (0.5)        | 485 (22.7)    | 216 (13.1)   |
| Poland               | 73 (4.6)        | 843 (52.6)      | 508 (31.7)    | 133 (8.3)     | 29 (1.8)      | 11 (0.7)       | 526 (24.7)    | 173 (10.8)   |
| Israel               | 41 (3.9)        | 506 (48.6)      | 337 (32.4)    | 110 (10.6)    | 32 (3.1)      | 9 (0.9)        | 448 (30.1)    | 151 (14.5)   |
| Finland              | 38 (3.6)        | 587 (55.0)      | 308 (28.9)    | 85 (8.0)      | 30 (2.8)      | 16 (1.5)       | 421 (28.3)    | 131 (12.3)   |
| Romania              | 79 (7.6)        | 523 (50.6)      | 300 (29.0)    | 90 (8.7)      | 28 (2.7)      | 9 (0.9)        | 389 (27.4)    | 127 (12.3)   |
| Portugal             | 43 (4.0)        | 595 (55.8)      | 318 (29.8)    | 94 (8.8)      | 10 (0.9)      | 4 (0.4)        | 351 (24.8)    | 108 (10.1)   |
| Egypt                | 18 (2.2)        | 312 (38.7)      | 283 (35.1)    | 126 (15.6)    | 42 (5.2)      | 20 (2.5)       | 406 (33.5)    | 188 (23.3)   |
| Greece               | 17 (1.9)        | 378 (42.7)      | 332 (37.5)    | 119 (13.4)    | 26 (2.9)      | 11 (1.2)       | 274 (23.6)    | 156 (17.6)   |
| Hungary              | 43 (4.9)        | 483 (54.9)      | 243 (27.6)    | 89 (10.1)     | 16 (1.8)      | 6 (0.7)        | 271 (23.5)    | 111 (12.6)   |
| Chile                | 12 (1.6)        | 347 (47.5)      | 267 (36.6)    | 82 (11.2)     | 18 (2.5)      | 1 (0.1)        | 330 (31.1)    | 101 (13.8)   |
| Qatar                | 23 (3.3)        | 216 (31.3)      | 272 (39.4)    | 130 (18.8)    | 33 (4.8)      | 9 (1.3)        | 358 (34.1)    | 172 (24.9)   |

Supplementary Table 2: United States Cities sorted by their walk scores (only showing cities with at least 20,000 weekdays of data; Methods). We use the top 10 and bottom 10 cities for our analysis (Fig. 3bc).

|    | City              | Walkability Score |    | City                 | Walkability Score |
|----|-------------------|-------------------|----|----------------------|-------------------|
| 1  | New York, NY      | 87.6              | 29 | Madison, WI          | 47.4              |
| 2  | Jersey City, NJ   | 84.4              | 30 | Tampa, FL            | 46.3              |
| 3  | San Francisco, CA | 83.9              | 31 | Atlanta, GA          | 45.9              |
| 4  | Boston, MA        | 79.5              | 32 | Houston, TX          | 44.2              |
| 5  | Philadelphia, PA  | 76.5              | 33 | Irvine, CA           | 43.9              |
| 6  | Miami, FL         | 75.6              | 34 | Dallas, TX           | 43.6              |
| 7  | Chicago, IL       | 74.8              | 35 | Sacramento, CA       | 43.4              |
| 8  | Washington, DC    | 74.1              | 36 | Omaha, NE            | 41.1              |
| 9  | Seattle, WA       | 70.8              | 37 | Columbus, OH         | 40.0              |
| 10 | Oakland, CA       | 68.5              | 38 | Albuquerque, NM      | 39.6              |
| 11 | Arlington, VA     | 67.1              | 39 | Orlando, FL          | 39.3              |
| 12 | Baltimore, MD     | 66.2              | 40 | Tucson, AZ           | 38.9              |
| 13 | Long Beach, CA    | 65.8              | 41 | El Paso, TX          | 38.7              |
| 14 | Minneapolis, MN   | 65.4              | 42 | Las Vegas, NV        | 38.6              |
| 15 | Los Angeles, CA   | 63.9              | 43 | Phoenix, AZ          | 38.3              |
| 16 | Portland, OR      | 62.8              | 44 | Austin, TX           | 35.4              |
| 17 | Honolulu, HI      | 62.6              | 45 | San Antonio, TX      | 33.7              |
| 18 | Saint Louis, MO   | 59.8              | 46 | Colorado Springs, CO | 33.0              |
| 19 | Pittsburgh, PA    | 59.8              | 47 | Kansas City, MO      | 32.1              |
| 20 | Milwaukee, WI     | 59.4              | 48 | Fort Worth, TX       | 31.6              |
| 21 | Cleveland, OH     | 56.8              | 49 | Oklahoma City, OK    | 31.6              |
| 22 | New Orleans, LA   | 56.3              | 50 | Louisville, KY       | 31.2              |
| 23 | Saint Paul, MN    | 56.0              | 51 | Raleigh, NC          | 28.8              |
| 24 | Denver, CO        | 55.7              | 52 | Indianapolis, IN     | 28.7              |
| 25 | Cincinnati, OH    | 50.1              | 53 | Nashville, TN        | 26.5              |
| 26 | Richmond, VA      | 49.2              | 54 | Jacksonville, FL     | 25.5              |
| 27 | San Diego, CA     | 48.5              | 55 | Charlotte, NC        | 24.4              |
| 28 | San Jose, CA      | 48.1              |    |                      |                   |

Supplementary Table 3: Three United States cities in close geographic proximity. Increased walkability is associated with decreased activity inequality in this set of otherwise similar cities. For example, San Jose and Fremont are similar to San Francisco in terms of age, race distribution, and median household income. However, San Francisco has a higher walkability rating, lower activity inequality, and lower obesity levels. Therefore, we find that the discovered relationship between walkability and activity inequality holds even for cities that are geographically and socioeconomically similar. Walkability scores are from WalkScore.com<sup>2</sup>, activity inequality and obesity are estimated from our dataset (marked \*), and all other variables are taken from United States Census 2010 and the American Community Survey 2006-2010<sup>2</sup>.

| City              | Walkability Score | Activity Inequality* (Percentile) | %Obese* | %White | %Asian | %Hispanic/Latino | %Black/African American | Median Age | Median Household Income (\$) |
|-------------------|-------------------|-----------------------------------|---------|--------|--------|------------------|-------------------------|------------|------------------------------|
| San Francisco, CA | 83.9              | 0.227 (0.07)                      | 13.4    | 48.5   | 33.3   | 15.1             | 6.1                     | 38.5       | 71,304                       |
| San Jose, CA      | 48.1              | 0.264 (0.33)                      | 18.7    | 42.8   | 32.0   | 33.2             | 3.2                     | 35.2       | 79,405                       |
| Fremont, CA       | 44.5              | 0.268 (0.48)                      | 18.2    | 32.8   | 50.6   | 14.8             | 3.3                     | 36.8       | 96,287                       |

Supplementary Table 4: Number of subjects for each city and group used in the walkability analysis (Fig. 3d). We use the 24 United States cities with at least 25 subjects across all groups (N=13,498 total; Methods).

| City              | female   |           |         |            |             |       |      | male     |           |         |            |             |       |      |
|-------------------|----------|-----------|---------|------------|-------------|-------|------|----------|-----------|---------|------------|-------------|-------|------|
|                   | Age 0-29 | Age 30-49 | Age 50+ | normal BMI | over-weight | obese | all  | Age 0-29 | Age 30-49 | Age 50+ | normal BMI | over-weight | obese | all  |
| Atlanta, GA       | 114      | 109       | 51      | 147        | 56          | 55    | 288  | 83       | 171       | 67      | 120        | 106         | 78    | 330  |
| Austin, TX        | 106      | 109       | 48      | 138        | 71          | 46    | 283  | 83       | 142       | 72      | 109        | 99          | 74    | 309  |
| Charlotte, NC     | 58       | 60        | 27      | 77         | 38          | 27    | 147  | 49       | 95        | 34      | 49         | 75          | 41    | 190  |
| Chicago, IL       | 228      | 236       | 77      | 268        | 126         | 126   | 572  | 182      | 314       | 102     | 237        | 229         | 111   | 624  |
| Cleveland, OH     | 51       | 53        | 36      | 53         | 35          | 43    | 145  | 29       | 48        | 35      | 27         | 52          | 28    | 119  |
| Dallas, TX        | 95       | 80        | 50      | 93         | 61          | 62    | 235  | 69       | 129       | 67      | 96         | 104         | 62    | 279  |
| Houston, TX       | 160      | 197       | 97      | 170        | 141         | 120   | 477  | 145      | 255       | 131     | 149        | 212         | 147   | 556  |
| Indianapolis, IN  | 57       | 51        | 33      | 57         | 37          | 39    | 146  | 50       | 56        | 48      | 35         | 65          | 47    | 156  |
| Jacksonville, FL  | 43       | 60        | 28      | 48         | 31          | 43    | 139  | 26       | 66        | 51      | 39         | 44          | 53    | 148  |
| Las Vegas, NV     | 62       | 79        | 51      | 80         | 62          | 40    | 203  | 71       | 158       | 68      | 76         | 125         | 82    | 305  |
| Los Angeles, CA   | 138      | 139       | 46      | 173        | 86          | 54    | 340  | 108      | 188       | 55      | 127        | 131         | 70    | 365  |
| Miami, FL         | 84       | 87        | 56      | 103        | 60          | 42    | 233  | 70       | 144       | 83      | 68         | 130         | 73    | 305  |
| New York, NY      | 240      | 222       | 92      | 322        | 131         | 62    | 583  | 168      | 288       | 100     | 230        | 200         | 91    | 573  |
| Orlando, FL       | 67       | 64        | 46      | 81         | 44          | 39    | 188  | 58       | 116       | 48      | 64         | 73          | 74    | 231  |
| Philadelphia, PA  | 132      | 119       | 42      | 126        | 68          | 89    | 311  | 95       | 100       | 36      | 67         | 91          | 59    | 238  |
| Phoenix, AZ       | 59       | 65        | 37      | 71         | 44          | 33    | 171  | 43       | 105       | 48      | 55         | 75          | 52    | 203  |
| Pittsburgh, PA    | 72       | 44        | 27      | 70         | 36          | 31    | 146  | 41       | 59        | 36      | 46         | 53          | 29    | 141  |
| Portland, OR      | 70       | 117       | 37      | 103        | 66          | 47    | 234  | 43       | 114       | 57      | 74         | 75          | 57    | 224  |
| Raleigh, NC       | 59       | 50        | 30      | 61         | 33          | 38    | 145  | 28       | 69        | 32      | 36         | 53          | 36    | 133  |
| San Antonio, TX   | 90       | 116       | 38      | 84         | 70          | 85    | 259  | 77       | 147       | 64      | 65         | 99          | 113   | 299  |
| San Diego, CA     | 115      | 129       | 52      | 140        | 80          | 57    | 308  | 86       | 191       | 77      | 113        | 148         | 80    | 372  |
| San Francisco, CA | 98       | 133       | 35      | 183        | 47          | 26    | 283  | 100      | 220       | 87      | 194        | 141         | 54    | 423  |
| San Jose, CA      | 80       | 86        | 51      | 106        | 61          | 37    | 226  | 68       | 195       | 86      | 131        | 137         | 70    | 366  |
| Seattle, WA       | 92       | 115       | 35      | 133        | 60          | 39    | 253  | 60       | 173       | 49      | 106        | 111         | 53    | 294  |
| Total             | 2370     | 2520      | 1122    | 2887       | 1544        | 1280  | 6315 | 1832     | 3543      | 1533    | 2313       | 2628        | 1634  | 7183 |
